# Supplementary material
Source: HighWire-hosted journal article supplement (https://erj.ersjournals.com/content/51/1/1701226)
Supplement: inline-supplementary-material-1 [file inline-supplementary-material-1.pdf]

Appendix 1: Country of birth for all patients offered LTBI testing

| <b>Country of birth</b>  | <b>n</b>     | <b>%</b>   |
|--------------------------|--------------|------------|
| Bangladesh               | 1,697        | 30.4       |
| India                    | 1,684        | 30.1       |
| Pakistan                 | 851          | 15.2       |
| Nigeria                  | 351          | 6.3        |
| Somalia                  | 189          | 3.4        |
| Philippines              | 109          | 2.0        |
| Afghanistan              | 85           | 1.5        |
| Guinea Bissau            | 75           | 1.3        |
| Nepal                    | 67           | 1.2        |
| Ghana                    | 65           | 1.2        |
| Uganda                   | 51           | 0.9        |
| Angola                   | 43           | 0.8        |
| South Africa             | 34           | 0.6        |
| Congo                    | 31           | 0.6        |
| Kenya                    | 28           | 0.5        |
| Sierra Leone             | 23           | 0.4        |
| Cameroon                 | 20           | 0.4        |
| Ethiopia                 | 18           | 0.3        |
| Burma                    | 15           | 0.3        |
| Ivory Coast              | 14           | 0.3        |
| Tanzania                 | 12           | 0.2        |
| Zimbabwe                 | 12           | 0.2        |
| Sudan                    | 11           | 0.2        |
| The Gambia               | 11           | 0.2        |
| Central African Republic | 9            | 0.2        |
| Guinea Republic          | 8            | 0.1        |
| Indonesia                | 8            | 0.1        |
| Republic of Moldova      | 8            | 0.1        |
| Eritrea                  | 7            | 0.1        |
| Zambia                   | 6            | 0.1        |
| Other*                   | 49           | 0.9        |
| <b>Total</b>             | <b>5,591</b> | <b>100</b> |

\*includes all countries with ≤5 patients
